# Supplementary material for: CU06-1004 (endothelial dysfunction blocker) ameliorates astrocyte end-feet swelling by stabilizing endothelial cell junctions in cerebral ischemia/reperfusion injury
Source: PubMed Central journal article supplement (PMC7297708; doi:10.1007/s00109-020-01920-z), 2020-05-16
Supplement: 109_2020_1920_MOESM1_ESM.pdf [file 109_2020_1920_MOESM1_ESM.pdf]

**The endothelial dysfunction blocker CU06-1004 ameliorates astrocyte end-feet swelling by stabilizing endothelial cell junctions in cerebral ischemia/reperfusion injury**

Dong Young Kim<sup>1</sup>, Haiying Zhang<sup>1,2</sup>, Songyi Park<sup>1</sup>, Yeaji Kim<sup>1</sup>, Cho-Rong Bae<sup>1</sup>, Young-Myeong Kim<sup>3</sup>, Young-Guen Kwon<sup>1</sup>

<sup>1</sup>Department of Biochemistry, College of Life science and Biotechnology, Yonsei University, Seoul, Republic of Korea

<sup>2</sup>CURACLE Co., Ltd., Seongnam-si, Gyeonggi-do, Republic of Korea

<sup>3</sup>Department of Molecular and Cellular Biochemistry, School of Medicine, Kangwon National University, Chuncheon-si, Gangwon-do, Republic of Korea

**Corresponding author:**

Young-Guen Kwon, Ph.D.

Department of Biochemistry, College of Life Science and Biotechnology, Yonsei University, 50 Yonsei-ro, Seodaemun-gu, Seoul, 03722, Republic of Korea

Tel: 82-2-2123-2903; Fax: 82-2-362-9897

E-mail: ygkwon@yonsei.ac.kr

## **Supplementary Materials and Methods**

### **Neurological scores**

Neurological defects were evaluated after 16 h reperfusion as previously described [1]. The scores were as follows: 0, no observable neurological deficit; 1, flexion of contralateral torso and forelimbs upon lifting the whole animal by the tail; 2, circling to the contralateral side when held by the tail with feet on the floor; 3, spontaneous circling to the contralateral side; 4, no spontaneous motor activity. For consistency, scoring was repeated three times.

### **Measurement of infarction volume**

Infarction volume was measured as previously described [1]. Briefly, after 16 h reperfusion, mice were anesthetized by intraperitoneal injection of 2.5% Avertin. Brains were harvested and cut into 2 mm coronal slices using a brain matrix. Each slice was incubated with 2% 2,3,5-triphenyltetrazolium chloride (TTC) at 37°C for 20 min. After the TTC reaction, infarction was marked by unstained areas, whereas normal areas were stained red. Infarction was quantified using Image J software (National Institutes of Health, Bethesda, MD, USA). To eliminate the effects of edema in the ipsilateral hemisphere, the infarction volume was calculated as follows:  $[(\text{contralateral hemisphere} - \text{undamaged ipsilateral hemisphere}) / (\text{contralateral hemisphere} \times 2) \times 100] \%$ .

### **Determination of blood-brain barrier (BBB) permeability and brain-water content**

BBB permeability was assessed by Evans blue (EB) extravasation using a previously described method with slight modification [1]. Briefly, after 16 h reperfusion, EB (2% in saline, 4 mL/kg) was injected into the tail vein. Mice were anesthetized by intraperitoneal injection of 2.5% Avertin 3 h after injection. Brains were harvested, and each hemisphere was weighed, homogenized in PBS, and centrifuged at 2,000 g for 15 min at 4°C. The resulting supernatant was added to an equal volume of trichloroacetic acid. After overnight incubation and centrifugation at 2,000 g for 15 min at 4°C, absorbance of the supernatant was measured by spectrophotometer at 620 nm. The dye content in the brain was calculated against a standard curve and expressed as  $\mu\text{g/g}$ . Brain-water content was calculated using the following formula:  $[(\text{wet weight} - \text{dry weight}) / \text{wet weight} \times 100] \%$ . After 16 h reperfusion, ipsilateral and contralateral hemispheres were weighed before (wet weight) and after drying at 80°C overnight (dry weight).

### **Immunofluorescence staining of brain sections**

Brains were fixed in 4% paraformaldehyde solution (pH 7.4) overnight at 4°C. Brains were then dehydrated in 15% sucrose solution overnight at 4°C and transferred to 30% sucrose solution at 4°C

until the brains completely sank. Fixed brains were embedded in optimal cutting temperature (OCT) compound (FSC22 clear; Leica Biosystems, Wetzlar, Germany) for 30 min at room temperature, transferred to an embedding mold filled with OCT, and frozen on dry ice. Frozen brains were cut to a 20  $\mu\text{m}$  thickness at  $-20^{\circ}\text{C}$  (CM1850; Leica Biosystems), and sections were immunostained on slides. The sections were fixed in acetone at  $-80^{\circ}\text{C}$  for 30 min and air dried. OCT compound was removed with running water. The sections were incubated in blocking solution (X0909; DAKO, Carpinteria, CA, USA) for 1 h at room temperature and incubated overnight with anti-mouse CD31 (550274, 1:100; BD Biosciences, San Jose, CA, USA), GFAP (MAB360, 1:100; MilliporeSigma, Burlington, MA, USA),  $\alpha$ -SMA (ab5694, 1:100; Abcam, Cambridge, MA, USA), AQP4 (ab46182, 1:100; Abcam), CX43 (#3512, 1:100; Cell Signaling Technology, Danvers, MA, USA),  $\beta$ 1-integrin (ab183666, 1:100; Abcam),  $\beta$ -dystroglycan (PA5-34908, 1:100; Thermo Fischer Scientific, Waltham, MA, USA), laminin (PA1-16730, 1:100; Thermo Fischer Scientific), or collagen type IV (ab6586, 1:100; Abcam) antibodies at  $4^{\circ}\text{C}$ . Sections were then washed with 0.1% Triton X-100 in PBS, incubated with anti-rat Alexa Fluor 594 (A21209), anti-mouse Alexa Fluor 488 (A11001), anti-mouse Alexa Fluor 594 (A11005), anti-rabbit Alexa Fluor 488 (A21206, 1:200; Thermo Fisher Scientific), or DAPI (D8417; 1  $\mu\text{g}/\text{mL}$ , MilliporeSigma) overnight at  $4^{\circ}\text{C}$ , and then washed with 0.1% Triton X-100 in PBS. All antibodies were dissolved in antibody diluent (S3022, DAKO). Sections were photographed with a confocal microscope (LSM 700 META; Carl Zeiss, Oberkochen, Germany).

### **Western blot analysis**

Brains were lysed in cell lysis buffer (100 mM Tris-Cl, pH 7.4, 5 mM EDTA, 50 mM NaCl, 0.5% NP-40, 1% Triton X-100) containing a protease inhibitor cocktail (05892970001; Roche, Mannheim, Germany). Lysates were centrifuged at 14,000 rpm for 15 min, and supernatants were collected. Proteins were separated by 8 or 10% sodium dodecyl sulfate polyacrylamide gel electrophoresis (SDS-PAGE) and then transferred to polyvinylidene difluoride membranes (IPVH00010, MilliporeSigma).

Membranes were incubated with primary antibodies (1:1,000) overnight at  $4^{\circ}\text{C}$  and with secondary antibodies (1:3,000) for 45 min at room temperature. The primary antibodies against  $\alpha$ -SMA, AQP4, CX43,  $\beta$ 1-integrin,  $\beta$ -dystroglycan, laminin, or collagen type IV were the same used in the staining above. EAAT1 (ab416) and EAAT2 (ab41621) antibodies were purchased from Abcam.  $\beta$ -actin (MA5-15739) was purchased from Thermo Fisher Scientific. Goat anti-rabbit-HRP (31460) and goat anti-mouse-HRP (31430; Thermo Fisher Scientific) were used as the secondary antibodies. Detection was performed using ECL (32106; Thermo Fisher Scientific) according to the manufacturer's instructions.

### **MTT assay**

Cell survival was analyzed by MTT assay. Cells were seeded at a density of  $1 \times 10^4$  cells/mL. ECs and astrocytes were seeded in 2% gelatin- and poly-D-lysine-coated 96-well plates, respectively, and incubated overnight. Cells were then switched to serum-free media and treated with vehicle or CU06-1004 after OGD/R. After 48 h, 3-(4, 5-Dimethyl-2-thiazolyl)-2, 5-diphenyl-2H-tetrazolium bromide (MTT) (0.1 mg/mL) was added, and cells were incubated at 37°C for 3 h. Residual MTT was removed, and the crystals were dissolved by incubating with dimethyl sulfoxide:ethanol (1:1). The absorbance at 560 nm was measured using a spectrophotometer.

### **5-bromo-2-deoxyuridine (BrdU) assay**

Astrocytes proliferation was analyzed by BrdU assay. Astrocytes were seeded at a density of  $7 \times 10^4$  cells/mL in 35-mm plates. After OGD/R, cells were treated with vehicle or CU06-1004 and labeled with 10  $\mu$ M of BrdU for 16 h. The cells were then incubated with 2 M HCl to hydrolyze DNA for 30 min at room temperature. The cells were washed with PBS and immunofluorescently stained with a BrdU antibody.

### **Immunofluorescence staining of cells**

Astrocytes were fixed in 4% paraformaldehyde (pH 7.4) for 20 min at room temperature and permeabilized with 0.1% Triton X-100 in PBS at 4°C. Cells were incubated with GFAP (1:300), CD11b (550282, 1:300; BD Biosciences), BrdU (sc-32323, 1:300; Santa Cruz Biotechnology, Inc., Dallas, Texas, USA), or ZO-1 (617300, 1:300; Thermo Fisher Scientific) overnight at 4°C. Cells were then rinsed with PBS and incubated with anti-mouse Alexa Fluor 488 (1:600), anti-rat Alexa Fluor 594 (1:600), or anti-rabbit Alexa Fluor 488 (1:600) antibodies for 60 min at room temperature. Next, cells were labeled with DAPI (1  $\mu$ g/mL) or F-actin (R415, 1:300; Thermo Fisher Scientific) for 30 min at room temperature. Samples were analyzed using a confocal microscope.

### **Reference**

1. Zhang H, Park JH, Maharjan S, Park JA, Choi KS, Park H, Jeong Y, Ahn JH, Kim IH, Lee JC et al (2017) Sac-1004, a vascular leakage blocker, reduces cerebral ischemia-reperfusion injury by suppressing blood-brain barrier disruption and inflammation. *J Neuroinflammation* 14:122. <https://doi.org/10.1186/s12974-017-0897-3>

## Supplementary Figures

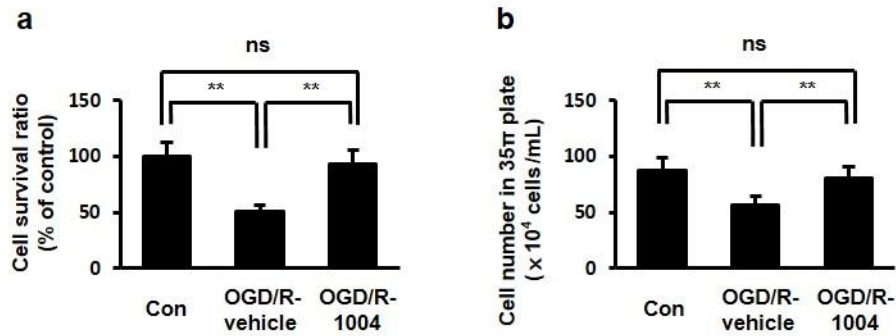

**Fig. S1** CU06-1004 protects HBMEC viability after OGD/R.

Viability was measured by MTT assay (a) and cell counting (b). **a, b** HBMECs were oxygen-glucose deprived for 6 h. After reoxygenation and treatment with vehicle or CU06-1004 (10  $\mu\text{g}/\text{mL}$ ) for 16 h, cells were added MTT for 48 h (a) or counted (b). \*\* $P < 0.01$ . Error bars indicate mean  $\pm$  SEM. ns, not significant; Con, control; OGD/R, oxygen glucose deprivation/reperfusion; 1004, CU06-1004

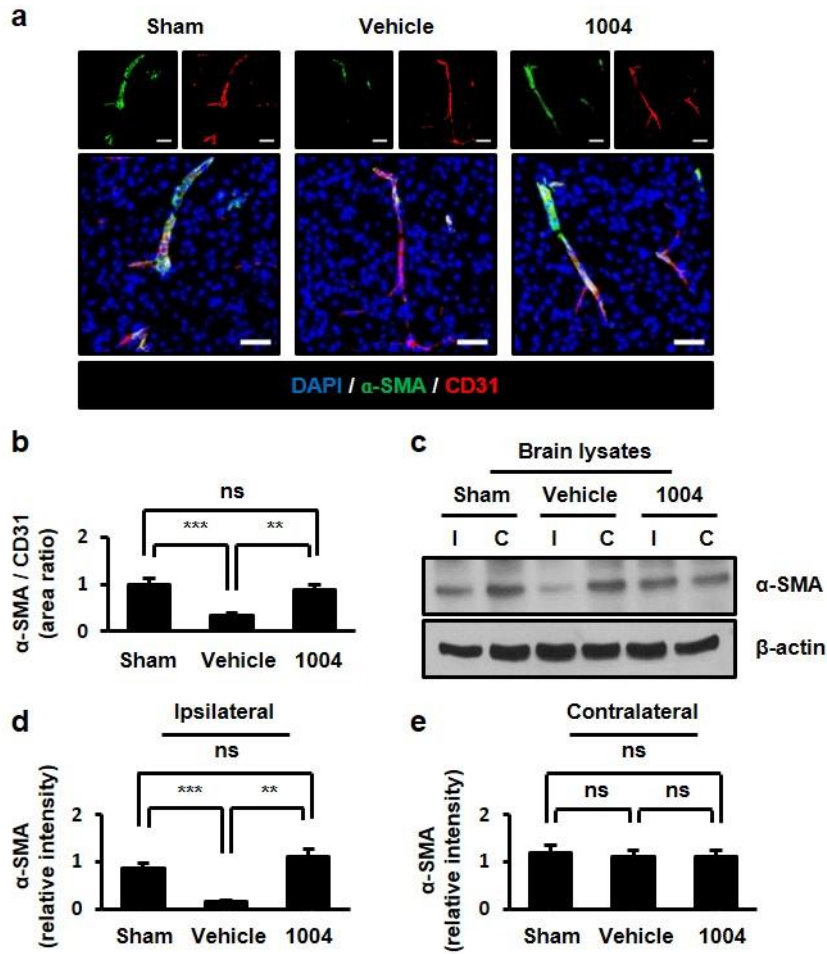

**Fig. S2** CU06-1004 prevents pericyte disruption after I/R.

**a** Comparison of  $\alpha$ -SMA expression in the sham, vehicle-I/R, and CU06-1004-I/R groups. **b** Quantification of  $\alpha$ -SMA-positive blood vessels.  $n = 5$  per group; scale bars:  $50 \mu\text{m}$ . **c** Effects of CU06-1004 administration on  $\alpha$ -SMA expression in brain lysates. **d, e** Quantification of blots using image J software.  $n = 3$  independent experiments.  $**P < 0.01$  and  $***P < 0.001$ . Error bars indicate mean  $\pm$  SEM. ns, not significant; DAPI, 4',6-diamidino-2-phenylindole;  $\alpha$ -SMA,  $\alpha$ -smooth muscle actin; CD31, cluster of differentiation 31; I, ipsilateral hemisphere; C, contralateral hemisphere; 1004, CU06-1004

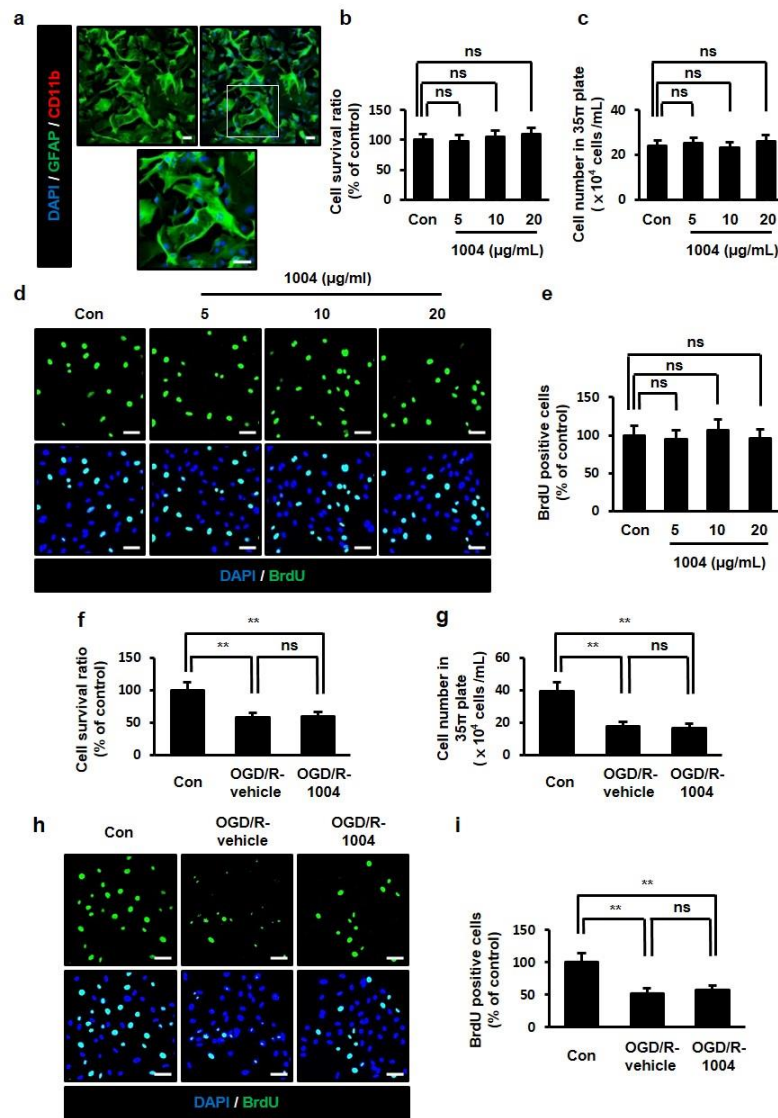

**Fig. S3** CU06-1004 did not directly affect astrocyte viability and proliferation with or without OGD/R. **a** Astrocytes were isolated from mouse brain and immunostained for GFAP and CD11b to confirm cellular identities. Square: enlarged image of the region. **b, c** Viability was measured by MTT assay (b) and cell counting (c). **d, e** Proliferation was evaluated using BrdU staining (d) and quantification of BrdU-positive cells (e). Viability was measured by MTT assay (f) and cell counting (g) after OGD/R. **f, g** Astrocytes were oxygen-glucose deprived for 6 h. After reoxygenation and treatment with vehicle or CU06-1004 (10  $\mu$ g/mL) for 16 h, cells were added MTT for 48 h (f) or counted (g). **h, i** Proliferation was evaluated using BrdU staining (h) and quantification of BrdU-positive cells after OGD/R (i). Scale bars: 50  $\mu$ m. \*\* $P < 0.01$ . Error bars indicate mean  $\pm$  SEM. ns, not significant; DAPI, 4',6-diamidino-2-phenylindole; GFAP, glial fibrillary acidic protein; BrdU, bromodeoxyuridine; Con, control; OGD/R, oxygen glucose deprivation/reperfusion; 1004, CU06-1004

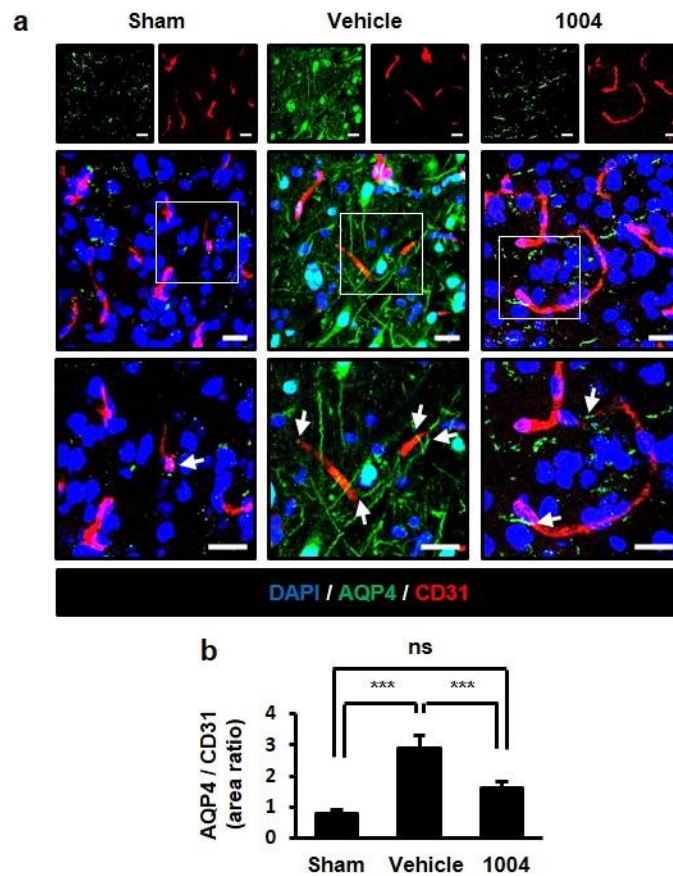

**Fig. S4** CU06-1004 reduces increased AQP4 expression on blood vessels after I/R.

**a** Comparison of AQP4 expression in the sham, vehicle-I/R, and CU06-1004-I/R groups. Square: enlarged image of the region. Arrows show the presence of AQP4 on blood vessels. **b** Quantification of AQP4-positive blood vessels.  $n = 5$  per group; scale bars:  $20 \mu\text{m}$ . \*\*\* $P < 0.001$ . Error bars indicate mean  $\pm$  SEM. ns, not significant; DAPI, 4',6-diamidino-2-phenylindole; AQP4, aquaporin 4; CD31, cluster of differentiation 31; 1004: CU06-1004



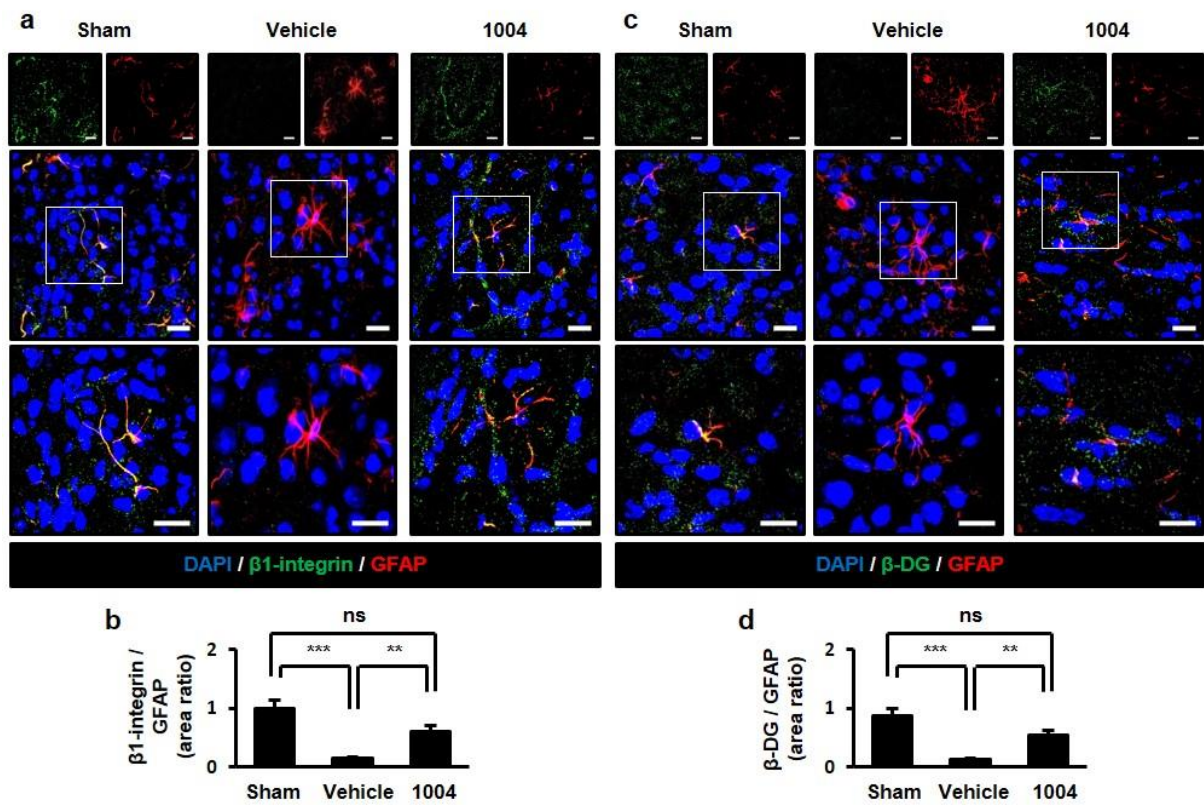

**Fig. S5** CU06-1004 prevents the degradation of basal membrane proteins in astrocytes after I/R.

**a, c** Comparison of  $\beta$ 1-integrin (a) and  $\beta$ -DG (c) expression in the sham, vehicle-I/R, and CU06-1004-I/R groups. Square: enlarged image of the region. **b, d** Quantification of  $\beta$ 1-integrin- (b) and  $\beta$ -DG-positive (d) astrocytes.  $n = 5$  per group; scale bars: 20  $\mu$ m. \*\* $P < 0.01$  and \*\*\* $P < 0.001$ . Error bars indicate mean  $\pm$  SEM. ns, not significant; DAPI, 4',6-diamidino-2-phenylindole; GFAP, glial fibrillary acidic protein; DG, dystroglycan; 1004, CU06-1004

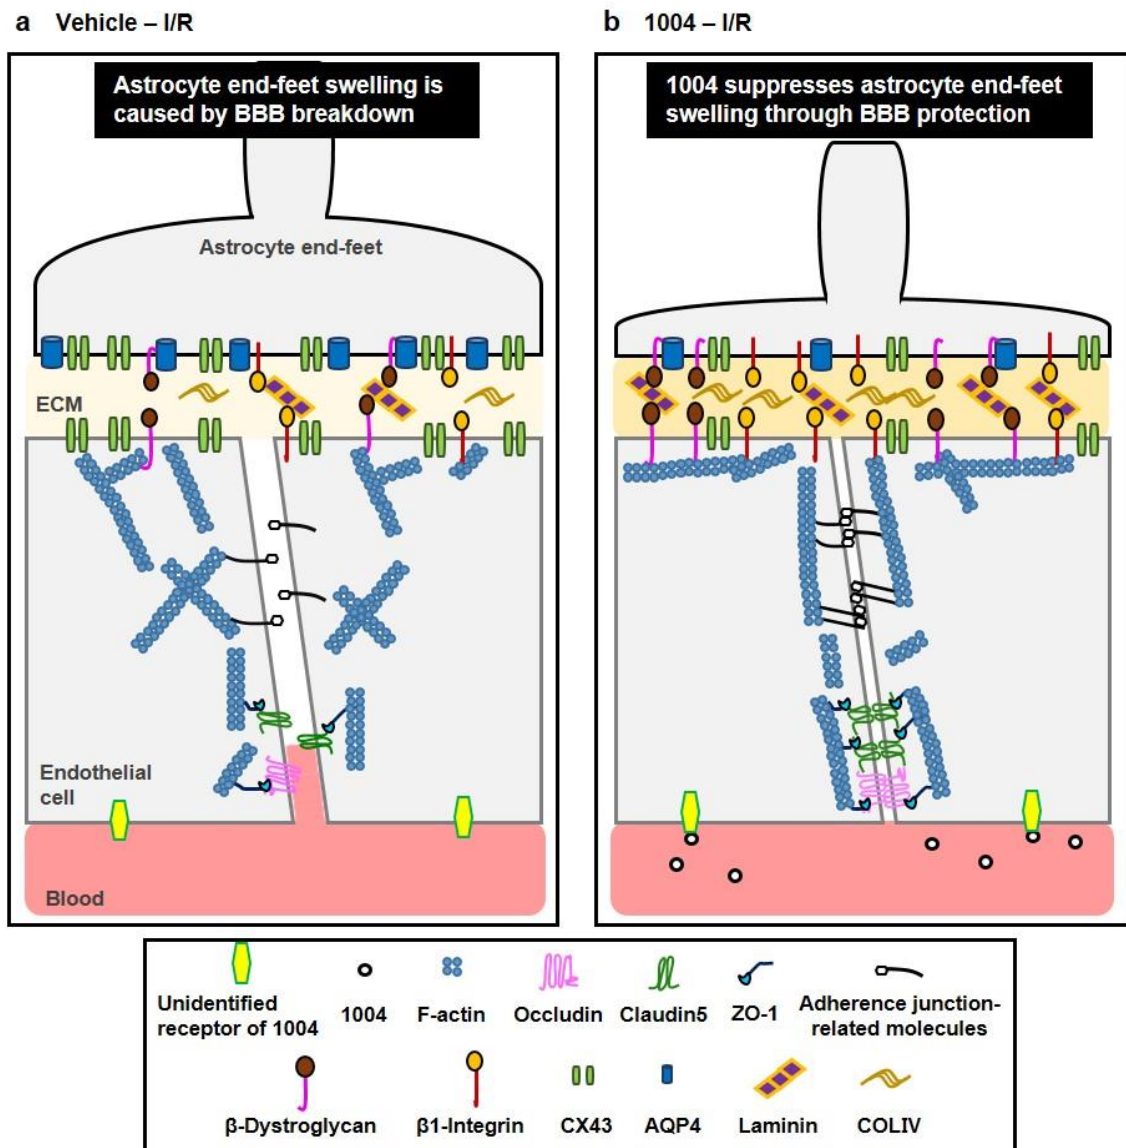

**Fig. S6** Schematic of CU06-1004 function in astrocyte end-feet swelling after I/R.

**a** Following I/R, astrocyte end-feet are swollen by destabilization of cortical actin ring in ECs and BBB breakdown. Basal membrane proteins and ECM were disrupted by BBB breakdown. **b** CU06-1004 inhibits astrocyte end-feet swelling by suppressing the destabilization of cortical actin ring in ECs. Basal membrane proteins and ECM were also inhibited by CU06-1004. I/R, ischemia/reperfusion; F-actin, fibrous actin; CX43, connexin 43; AQP4, aquaporin 4; COLIV, collagen type IV; ZO-1, zona occludense-1; ECM, extracellular matrix; DG, dystroglycan; 1004, CU06-1004
