# Supplementary material for: CU06-1004 (endothelial dysfunction blocker) ameliorates astrocyte end-feet swelling by stabilizing endothelial cell junctions in cerebral ischemia/reperfusion injury
Source: PubMed Central journal article supplement (PMC7297708; doi:10.1007/s00109-020-01920-z), 2020-05-16
Supplement: 109_2020_1920_MOESM2_ESM.pdf [file 109_2020_1920_MOESM2_ESM.pdf]

**The endothelial dysfunction blocker CU06-1004 ameliorates astrocyte end-feet swelling by stabilizing endothelial cell junctions in cerebral ischemia/reperfusion injury**

Dong Young Kim<sup>1</sup>, Haiying Zhang<sup>1, 2</sup>, Songyi Park<sup>1</sup>, Yeaji Kim<sup>1</sup>, Cho-Rong Bae<sup>1</sup>, Young-Myeong Kim<sup>3</sup>, Young-Guen Kwon<sup>1</sup>

<sup>1</sup>Department of Biochemistry, College of Life science and Biotechnology, Yonsei University, Seoul, Republic of Korea

<sup>2</sup>CURACLE Co., Ltd., Seongnam-si, Gyeonggi-do, Republic of Korea

<sup>3</sup>Department of Molecular and Cellular Biochemistry, School of Medicine, Kangwon National University, Chuncheon-si, Gangwon-do, Republic of Korea

**Corresponding author**

Young-Guen Kwon, Ph.D.

Department of Biochemistry, College of Life Science and Biotechnology, Yonsei University, 50 Yonsei-ro, Seodaemun-gu, Seoul, 03722, Republic of Korea

Tel: 82-2-2123-2903; Fax: 82-2-362-9897

E-mail: ygkwon@yonsei.ac.kr

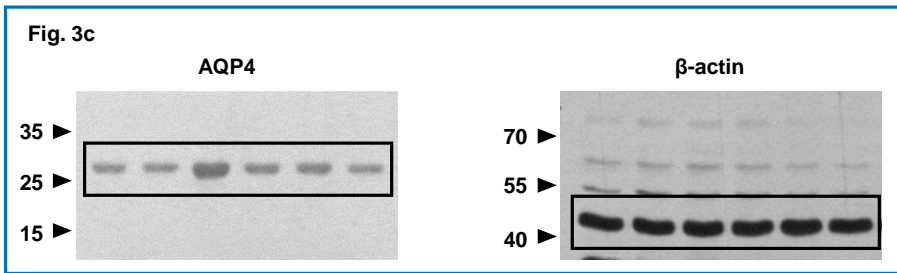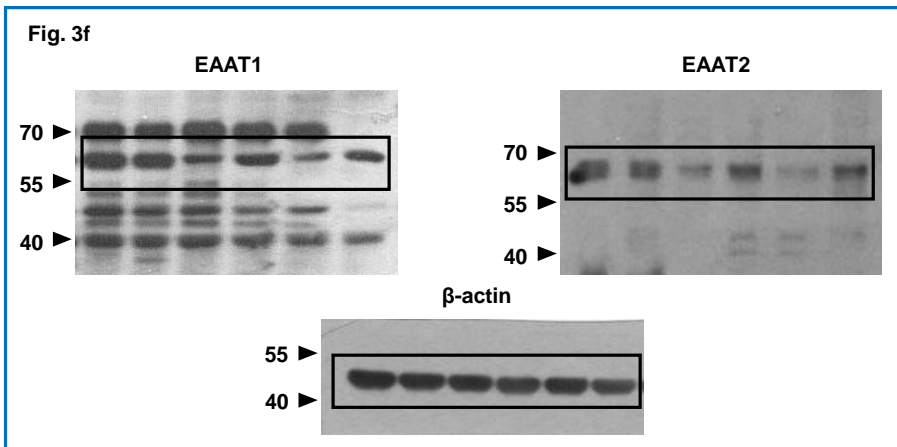

**Full unedited gels for Figure 3**

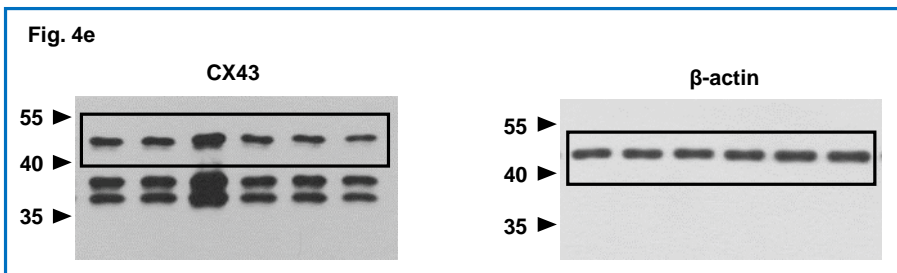

**Full unedited gels for Figure 4**

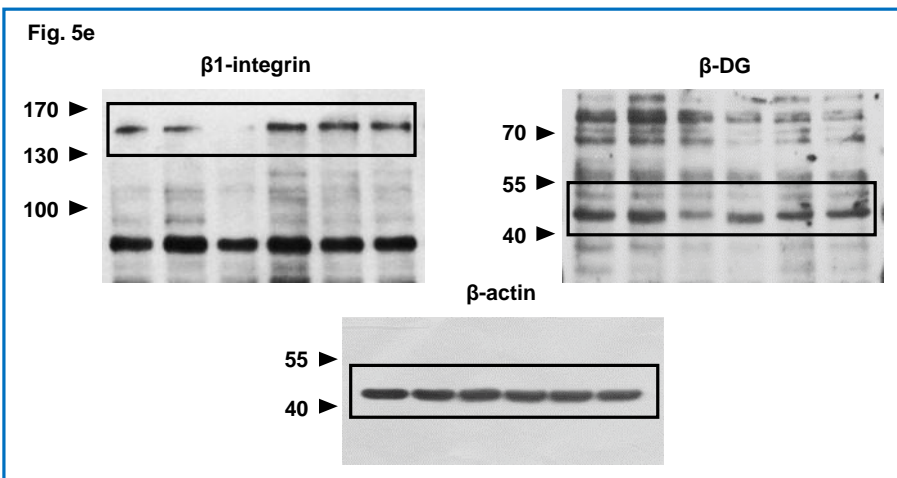

**Full unedited gels for Figure 5**

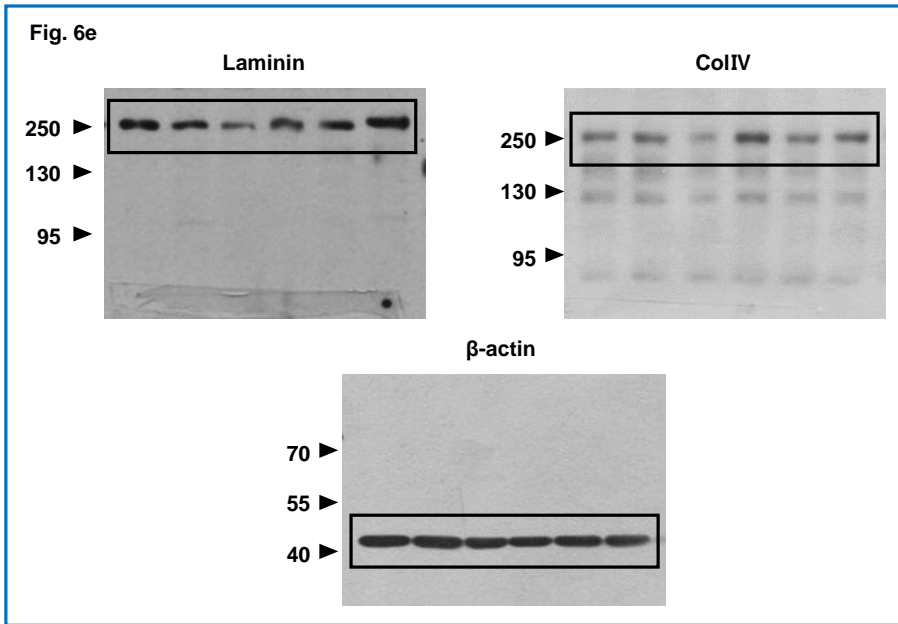

**Full unedited gels for Figure 6**

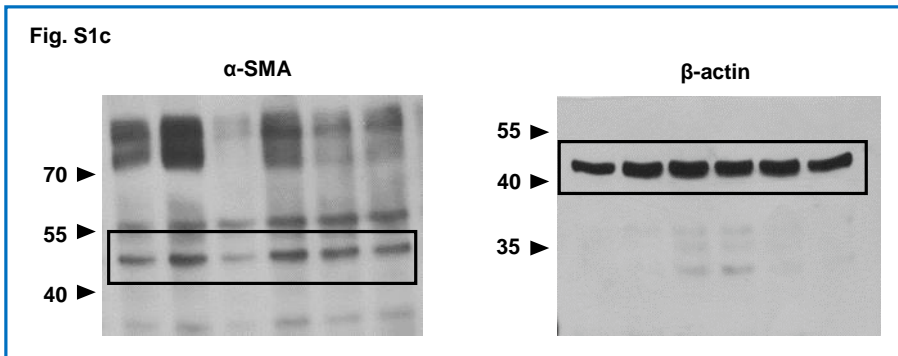

**Full unedited gels for Supplemental Figure 1**
